# Supplementary material for: A pilot cohort study of deprescribing for nursing home patients acutely admitted to hospital
Source: PubMed Central journal article supplement — Ther Adv Drug Saf. 2019 Jun 4;10:2042098619854876. doi: 10.1177/2042098619854876 (PMC6552337; doi:10.1177/2042098619854876), 2019-06-04
Supplement: Supplemental_Material.pdf [file Supplemental_Material.pdf]

Appendix 1

Analysis of health related quality of life questions versus deprescribing adjusted for number of Beers List medications where the respondent=patient (rather than proxy).

**Table 1.**

**Descriptive and inferential statistics for Quality of Life scores**

| Short Form 8 (SF-8)<br>Quality of Life<br>Question | 30 Days                                |                                              |              | 90 Days                               |                                              |               |
|----------------------------------------------------|----------------------------------------|----------------------------------------------|--------------|---------------------------------------|----------------------------------------------|---------------|
|                                                    | Deprescribing<br>at Discharge<br>N=56* | Not<br>Deprescribing<br>at Discharge<br>N=20 | P<br>value** | Deprescribing<br>at Discharge<br>N=45 | Not<br>Deprescribing<br>at Discharge<br>N=19 | P value**     |
| 1                                                  | 3 (2,4)                                | 3 (2,4)                                      | 0.3295       | 3 (3,4)                               | 3.5 (3,4)                                    | 0.0612        |
| 2                                                  | 2 (2,4)                                | 3 (2,4)                                      | 0.6000       | 2 (2,3)                               | 2 (2,4)                                      | 0.2822        |
| 3                                                  | 2 (1.5,3)                              | 3 (2,5)                                      | 0.4816       | 2 (1.5,3.5)                           | 2.5 (2,4)                                    | 0.4440        |
| 4                                                  | 3 (2,4)                                | 3 (2,5)                                      | 0.2311       | 3 (2,4)                               | 3 (2,4)                                      | 0.8367        |
| 5                                                  | 2 (2,3)                                | 2 (2,3)                                      | 0.9143       | 3 (2,3)                               | 3 (2,3)                                      | 0.2351        |
| 6                                                  | 3 (2,4)                                | 4 (2,5)                                      | 0.6406       | 3 (2,4)                               | 4 (2,4)                                      | 0.6865        |
| 7                                                  | 4 (3,5)                                | 4 (2.5,5)                                    | 0.2789       | 4 (3,5)                               | 3 (2,5)                                      | <b>0.0010</b> |
| 8                                                  | 3 (2,5)                                | 4 (3,5)                                      | 0.8901       | 4 (2,5)                               | 4 (3,5)                                      | 0.2866        |
| Summary - SF8                                      | 24 (20, 27)                            | 27.5 (19.5,32)                               | 0.7452       | 25 (21,28)                            | 25 (19,29)                                   | 0.2344        |

\*Median (Interquartile range)

\*\*Global P values from Ordinal logistic Generalised Estimating Equation (GEE) models for Quality of Life questions versus deprescribing group, controlling for Discharge Beer score and adjusting for clustering on hospital.
